# Supplementary material
Source: PubMed Central journal article supplement (PMC5711580)
Supplement: NIHMS918026-supplement-Supp_info.pdf [file NIHMS918026-supplement-Supp_info.pdf]

**Table S1. Sensitivity of parental and BR melanoma cell lines to ADI-PEG20**

| Cell line    | BRAF (V600E)    | ASS1 level <sup>a</sup> | IC50 of ADI-PEG20 <sup>b</sup> | Caspases activity (%) <sup>c</sup> | IC50 of BRAFi <sup>b</sup> | IC50 of MEKi |
|--------------|-----------------|-------------------------|--------------------------------|------------------------------------|----------------------------|--------------|
| A375         | Mut             | (-) → (-)               | 181±10.5 ng/ml                 | 27.2±3.1%                          | 0.5±0.2 μM                 | 9.8±1.1 nM   |
| A375BR       | Mut             | (-) → (-)               | 68±8.2 ng/ml                   | 50.3±7.8%                          | 10.2±0.5 μM                | 5.6±0.8 nM   |
| A375BMR      | Mut             | (-) → (-)               | 59±6.6 ng/ml                   | 55.1±6.3%                          | > 10 μM                    | 17.1±2.1 nM  |
| A2058        | Mut             | (-) → (+)               | 425±18.5 ng/ml                 | 3.2±0.5%                           | 5.1±0.4 μM                 | 19±2.1 nM    |
| A2058BR      | Mut             | (-) → (-)               | 125±7.8 ng/ml                  | 27.9±4.8%                          | 25±1.3 μM                  | 15.3±1.4 nM  |
| A2058BMR     | Mut             | (-) → (-)               | 105±4.5 ng/ml                  | 33.4±8.2%                          | > 25 μM                    | 33.1±1.8 nM  |
| MEL-1220     | Mut             | (-) → (-)               | 215±12 ng/ml                   | 2.6±1.1%                           | 4.2±0.5 μM                 | 7.8±1.2 nM   |
| MEL-1220BR   | Mut             | (-) → (-)               | 62.5±3.3 ng/ml                 | 26.5±3.3%                          | 15.2±0.8 μM                | 5.5±0.6 nM   |
| SK-MEL-28    | Mut             | (-) → (+)(+)            | 222±4.3 ng/ml                  | 9.8±2.3%                           | 2.5±0.8 μM                 | 1.2±0.3 nM   |
| SK-MEL-28BR  | Mut             | (-) → (+)               | 103±8.4 ng/ml                  | 20.5±3.7%                          | 10±1.3 μM                  | 2.0±0.5 nM   |
| SK-MEL-28BMR | Mut             | (-) → (-)               | 78.9±6.3 ng/ml                 | 31.4±2.2%                          | > 10 μM                    | 5.2±1.1 nM   |
| UACC-62      | Mut             | (-) → (+)               | 168±7.3 ng/ml                  | 2.9±1.5%                           | 7.8±0.6 μM                 | 2.5±0.3 nM   |
| UACC-62BR    | Mut             | (-) → (-)               | 92±5.5 ng/ml                   | 14.9±5.5%                          | 17.2±2.1 μM                | 1.9±0.5 nM   |
| BJ           | Skin fibroblast | (+)(+)→(+)(+)           | ND                             | ND                                 | ND                         | ND           |

<sup>a</sup> The inducible ASS expression has been identified by qRT-PCR and immunoblotting following ADI-PEG20 treatment (100 ng/ml) for 48 hr.

<sup>b</sup> IC50 values are based on cell viability curves, corresponding to previous study (Li, et al., 2016).

<sup>c</sup> The percentages of caspase activity were quantified by FACS following ADI-PEG20 treatment (100 ng/ml) for 72 hr. The proportions of treatment groups are normalized by those of untreated groups.

ND = Not detected, Mut = Mutant, BRAFi = vemurafenib, MEKi = trametinib

Suppl. Fig. 1

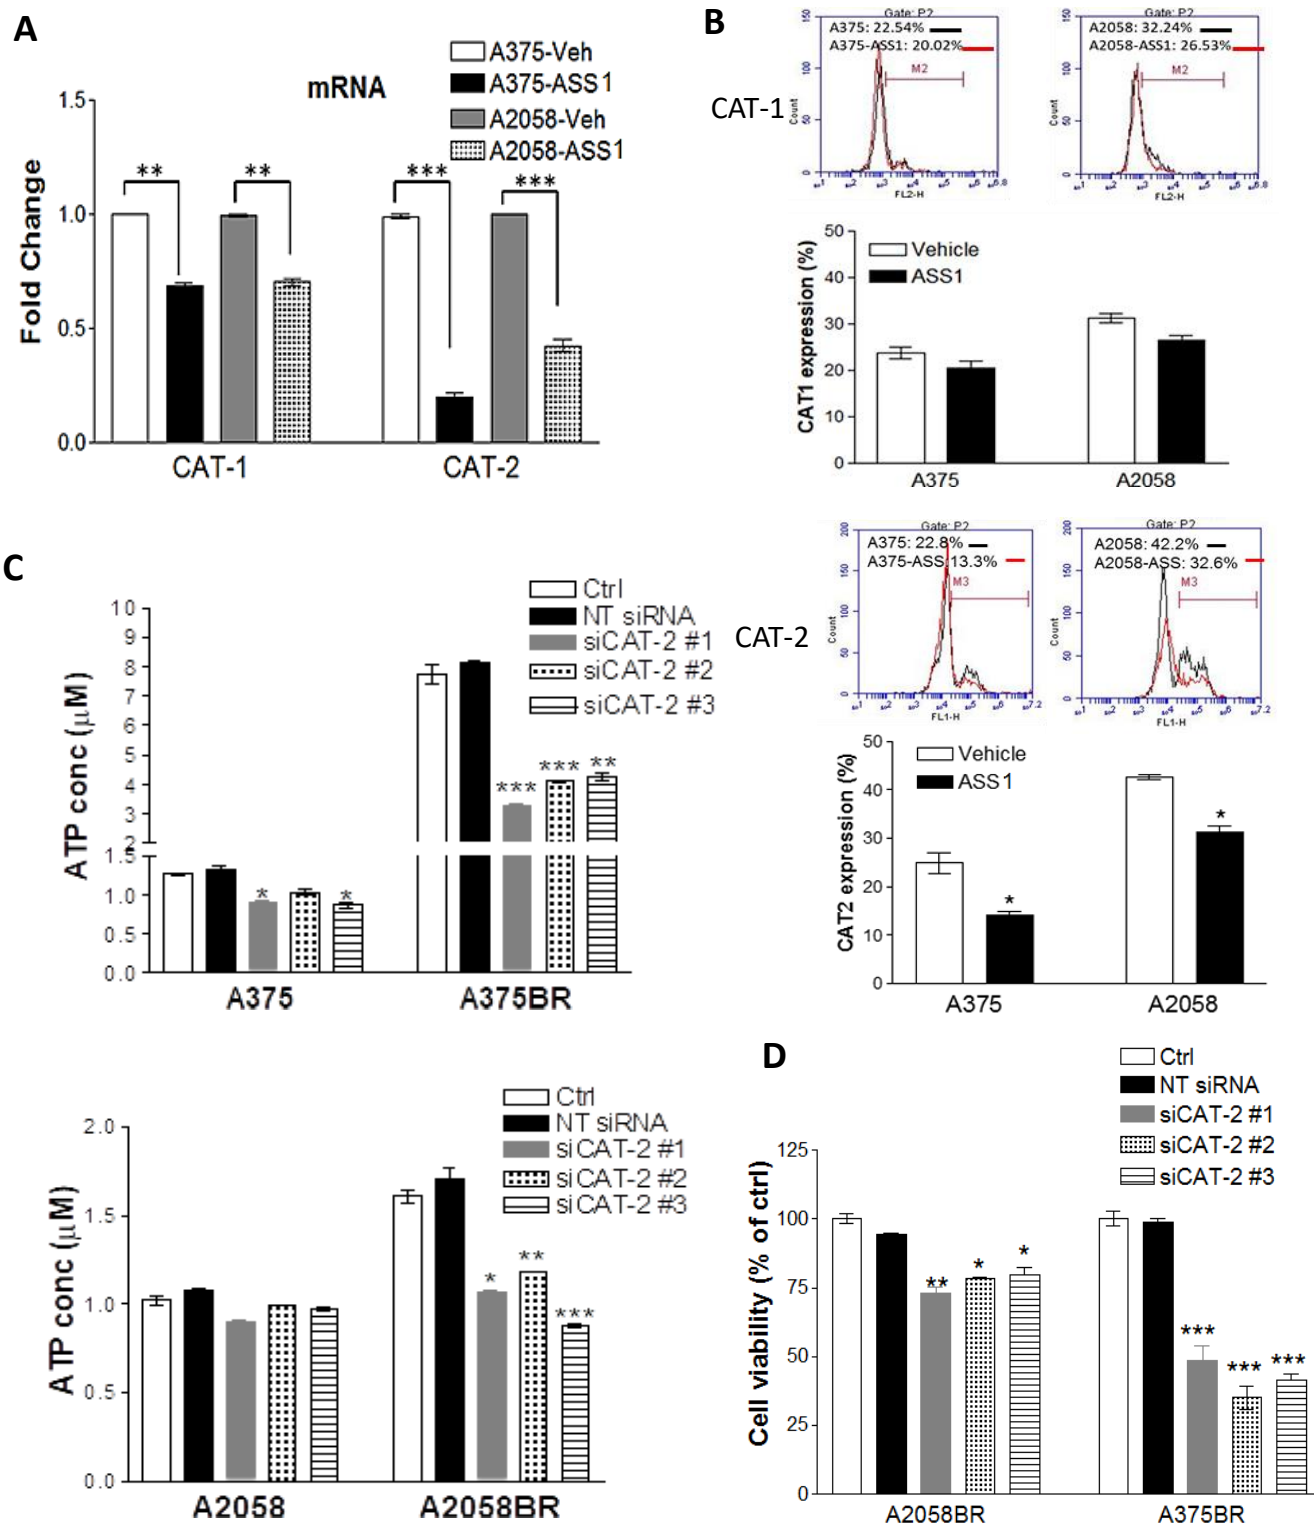

**Suppl. Fig. 1.** Arginine transporter CAT-2 is needed for ASS1-negative melanoma cells to obtain exogenous arginine for energy source. A375 and A2058 cells were transfected with the plasmid encoding ASS1 and vehicle plasmid, respectively. (A) CAT-1 and CAT-2 RNA levels were analyzed by qRT-PCR. (B) CAT-2 expression was detected by FACS and quantitated upon the percentage of right shift (M2 or M3 gate). (C) Knockdown of CAT-2 using 50 nM of siRNA (siCAT-2 #1, siCAT-2 #2, or siCAT-2 #3) was carried out in parental and BR cells for 48 hr and then their intracellular ATP concentration was detected. Intracellular ATP concentration was normalized by protein content. Non-targeting (NT) siRNA was used as a negative control. (D) The viability of BR cells was determined by MTT assay (\* $p < 0.05$ , \*\* $p < 0.01$ , and \*\*\* $p < 0.005$ ).

Suppl. Fig. 2

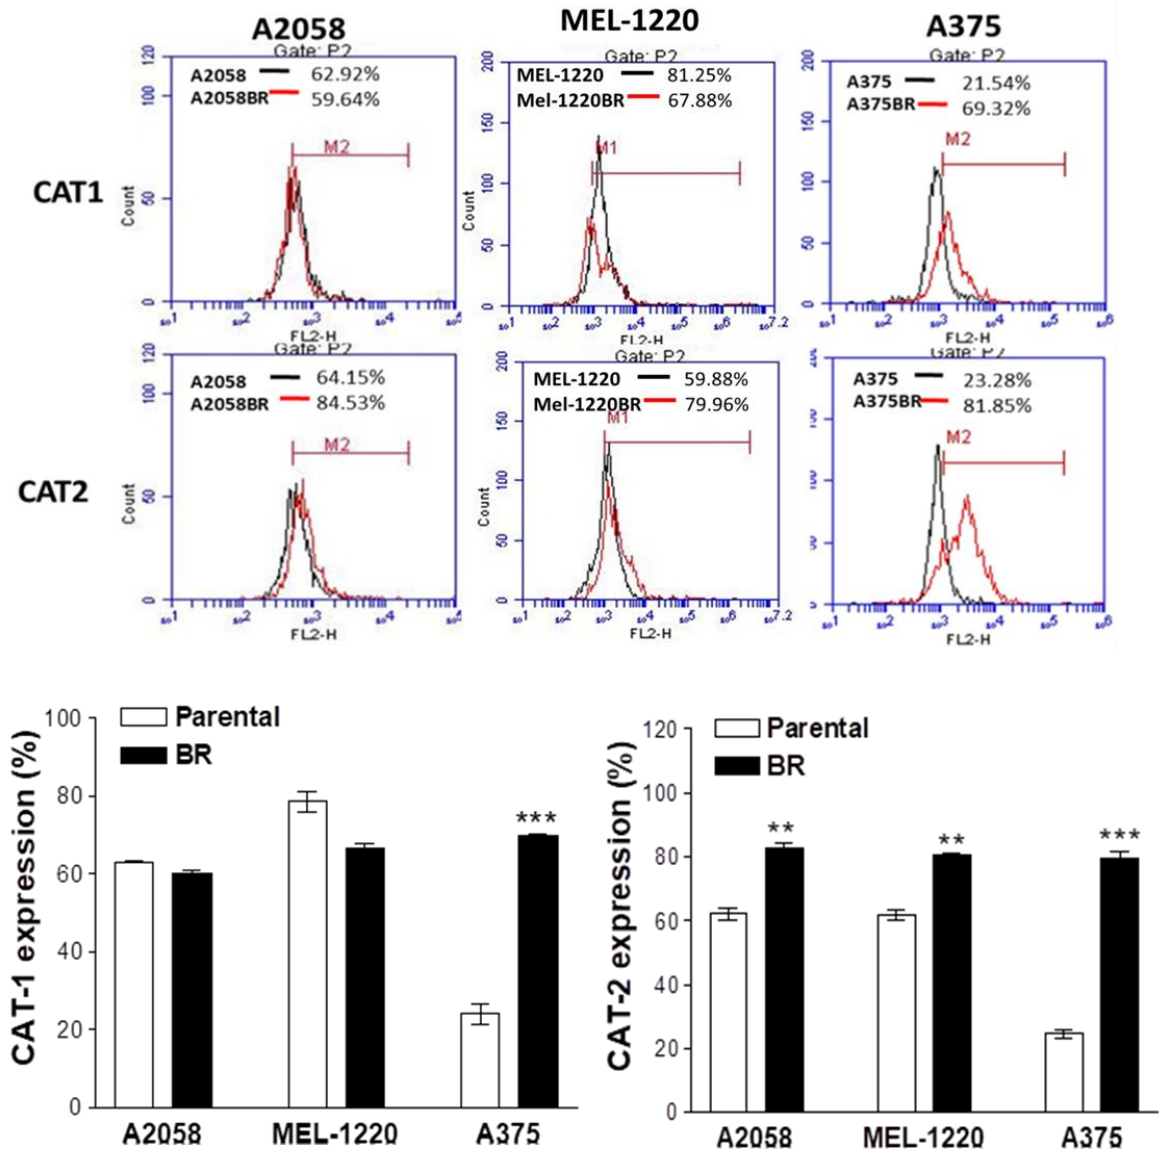

**Suppl. Fig. 2.** BRAFi resistant (BR) melanoma cells acquire more exogenous arginine by expressing higher levels of arginine transporter CAT-2 compared to their parental counterparts. Melanoma cells were incubated with anti-CAT-1 or anti-CAT-2 antibody and second antibody conjugated with Alexa Fluor® 555 and then analyzed by flow cytometry (FACS). The black and red curves in histograms respectively indicated parental and BR cells. The relative expression of CAT-1 or CAT-2 shown in bar graphs was based on the percentage of M1 or M2 gate. (\* $p < 0.05$ , \*\* $p < 0.01$ , and \*\*\* $p < 0.005$ ).

Suppl. Fig. 3

A

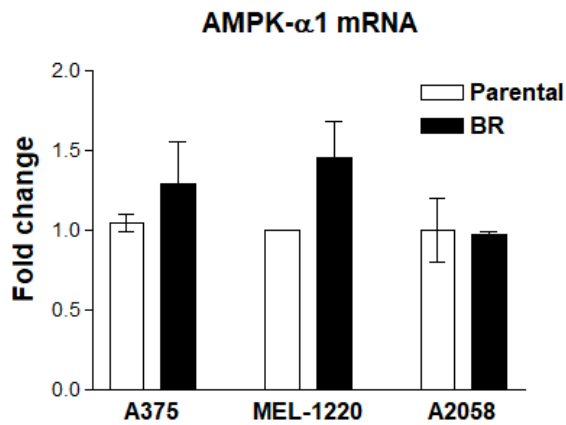

B

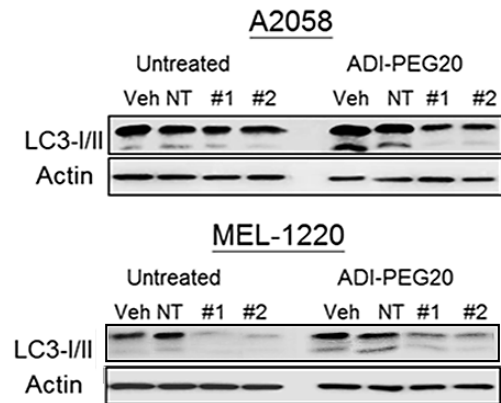

C

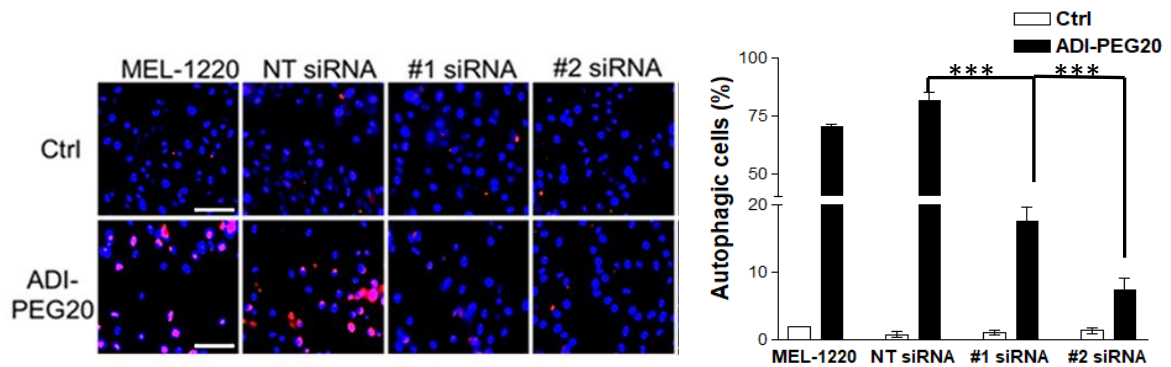

D

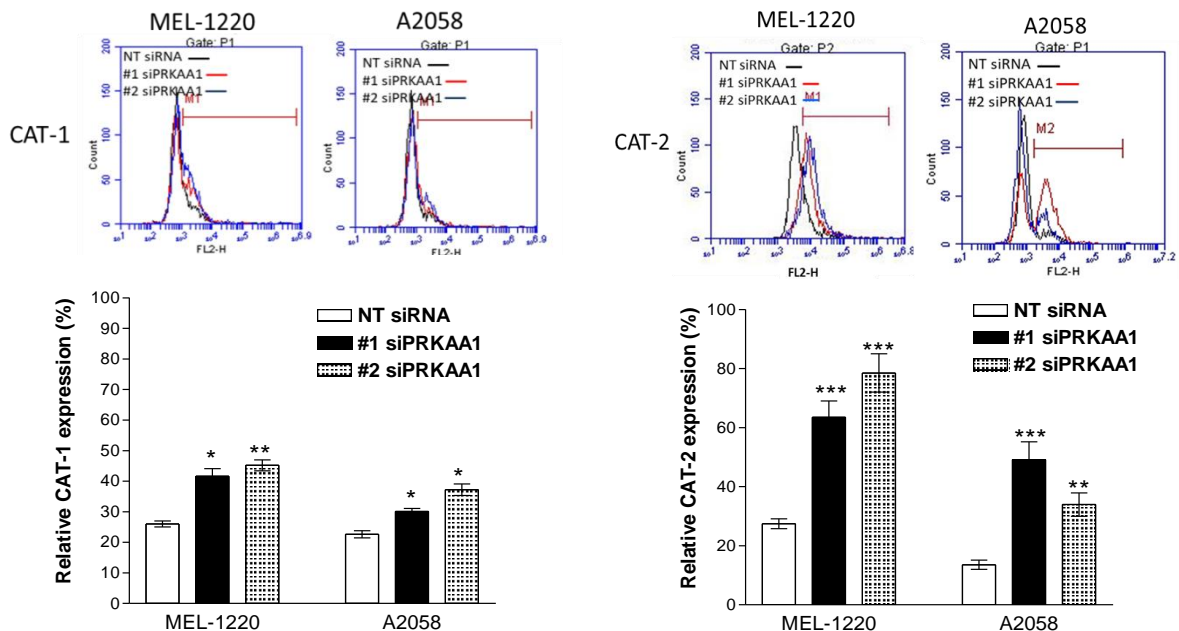

**Suppl. Fig. 3.** Silencing AMPK-α1 expression results in abrogation of autophagy and significant upregulation CAT-2 expression and slightly enhances CAT-1 expression in parental cells. (A) There was no significant difference of AMPK-α1 RNA levels between parental and BR cells. (B) A2058 and MEL-1220 cells were transfected with individual siRNAs against AMPK-α1 or a non-targeting (NT) siRNA (50 nM). After cultured in arginine free or completed medium (ctrl), the cell lysates of these transfectants were subjected for to immunoblot for detection of LC3-I/II expression. (C) The autophagosomes and nuclei in MEL-1220 transfectants were stained with lysotracker (red) and DAPI (blue), respectively (scale bar = 50 μm). Autophagy positive cells were quantitated and shown in a bar graph. (D) The levels of CAT-1 or CAT-2 of these transfectants were detected by anti-CAT-1 or anti-CAT-2 antibody and second antibody conjugated with Alexa Fluor® 555, and quantitated using FACS. Their relative expressions in bar graphs were based on the percentages of M1 or M2 gates in histograms (\*p < 0.05, \*\*p < 0.01, and \*\*\*p < 0.005).

Suppl. Fig. 4

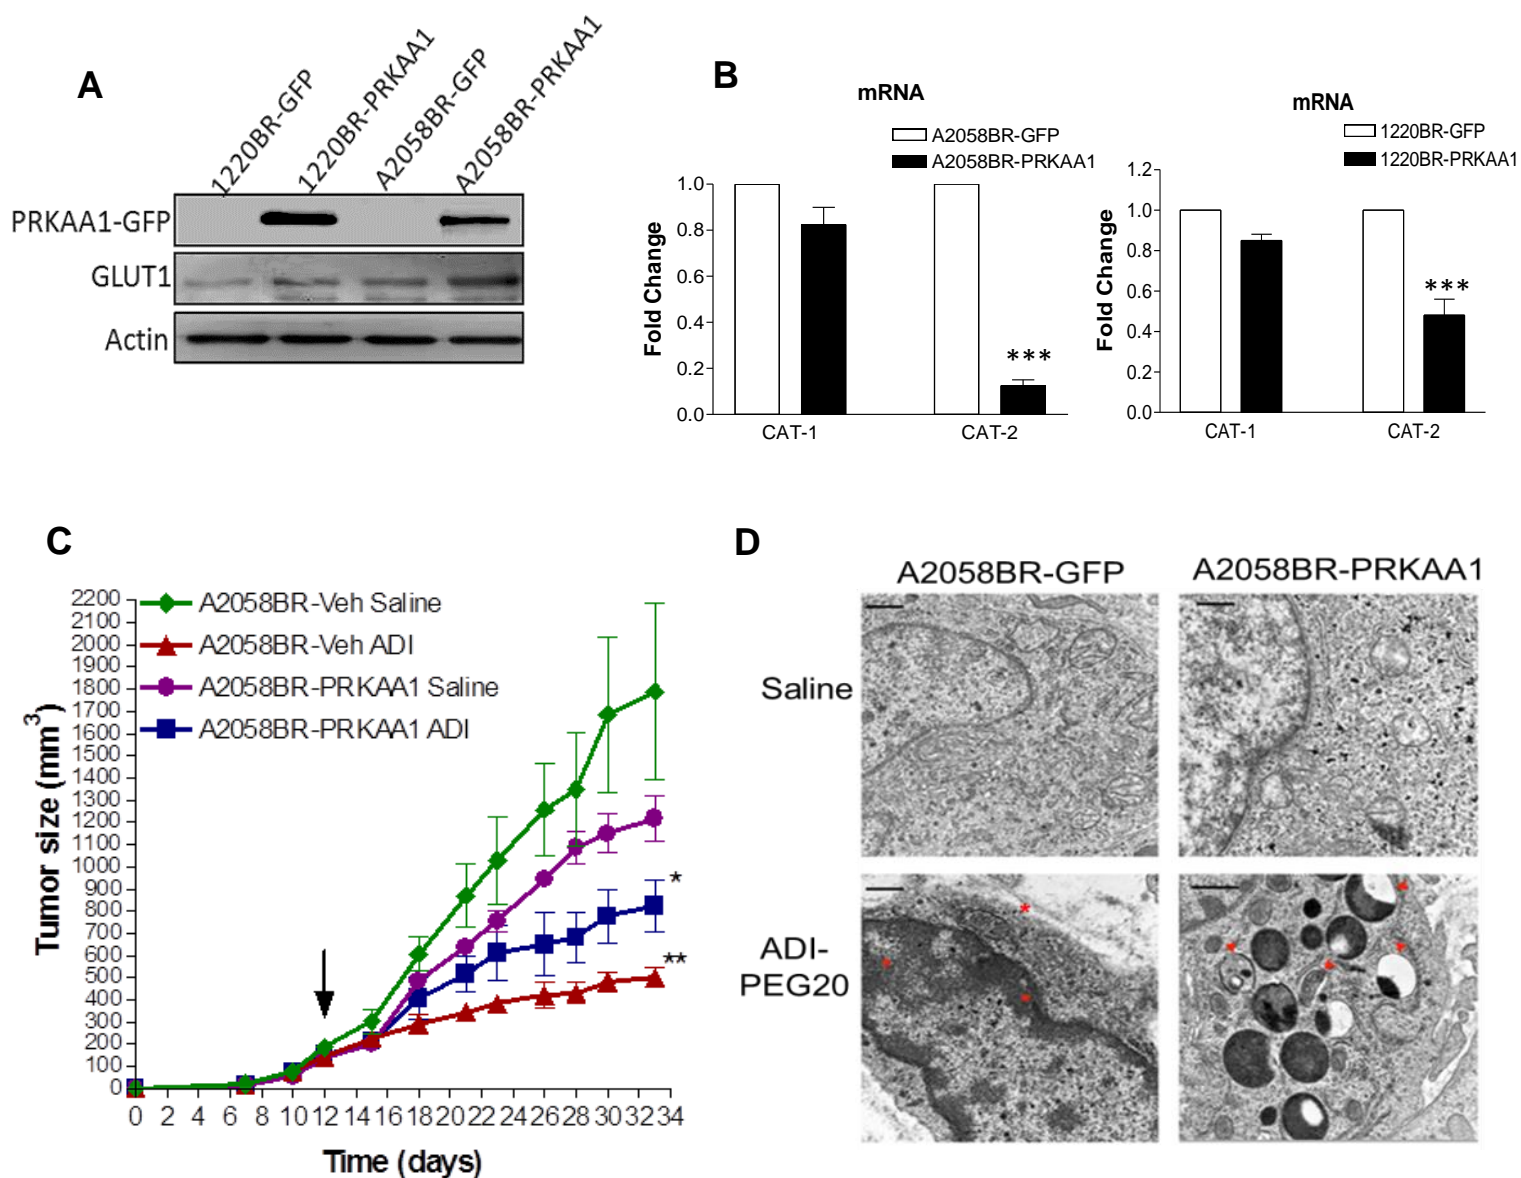

**Suppl. Fig. 4.** Overexpressing AMPK- $\alpha$ 1 (PRKAA1)-GFP in BR cells restores the ability to undergo autophagy and switches acquisition of arginine to glucose. A2058BR and MEL-1220BR cells were transfected with plasmids containing AMPK- $\alpha$ 1-GFP or GFP alone (vehicle). (A) The levels of AMPK- $\alpha$ 1 and GLUT1 in transfectants were determined by immunoblotting. (B) CAT-1 and CAT-2 expressions were confirmed by qRT-PCR (C)  $1 \times 10^6$  transfectants were injected into mice. Mice bearing A2058BR-GFP or A2058BR-PRKAA1 melanoma xenografts were treated with 100 ng/ml ADI-PEG20 or saline when the tumor volume reached around 100 mm<sup>3</sup>. Tumor volumes were represented as mean  $\pm$  SEM (n = 5); \*p < 0.05, \*\*p < 0.01, and \*\*\*p < 0.005. (D) *In vivo* cell death (red asterisks) and autophagy (red arrows) were visualized by TEM, 25000X. Scale bar = 500 nm.



Suppl. Fig. 5

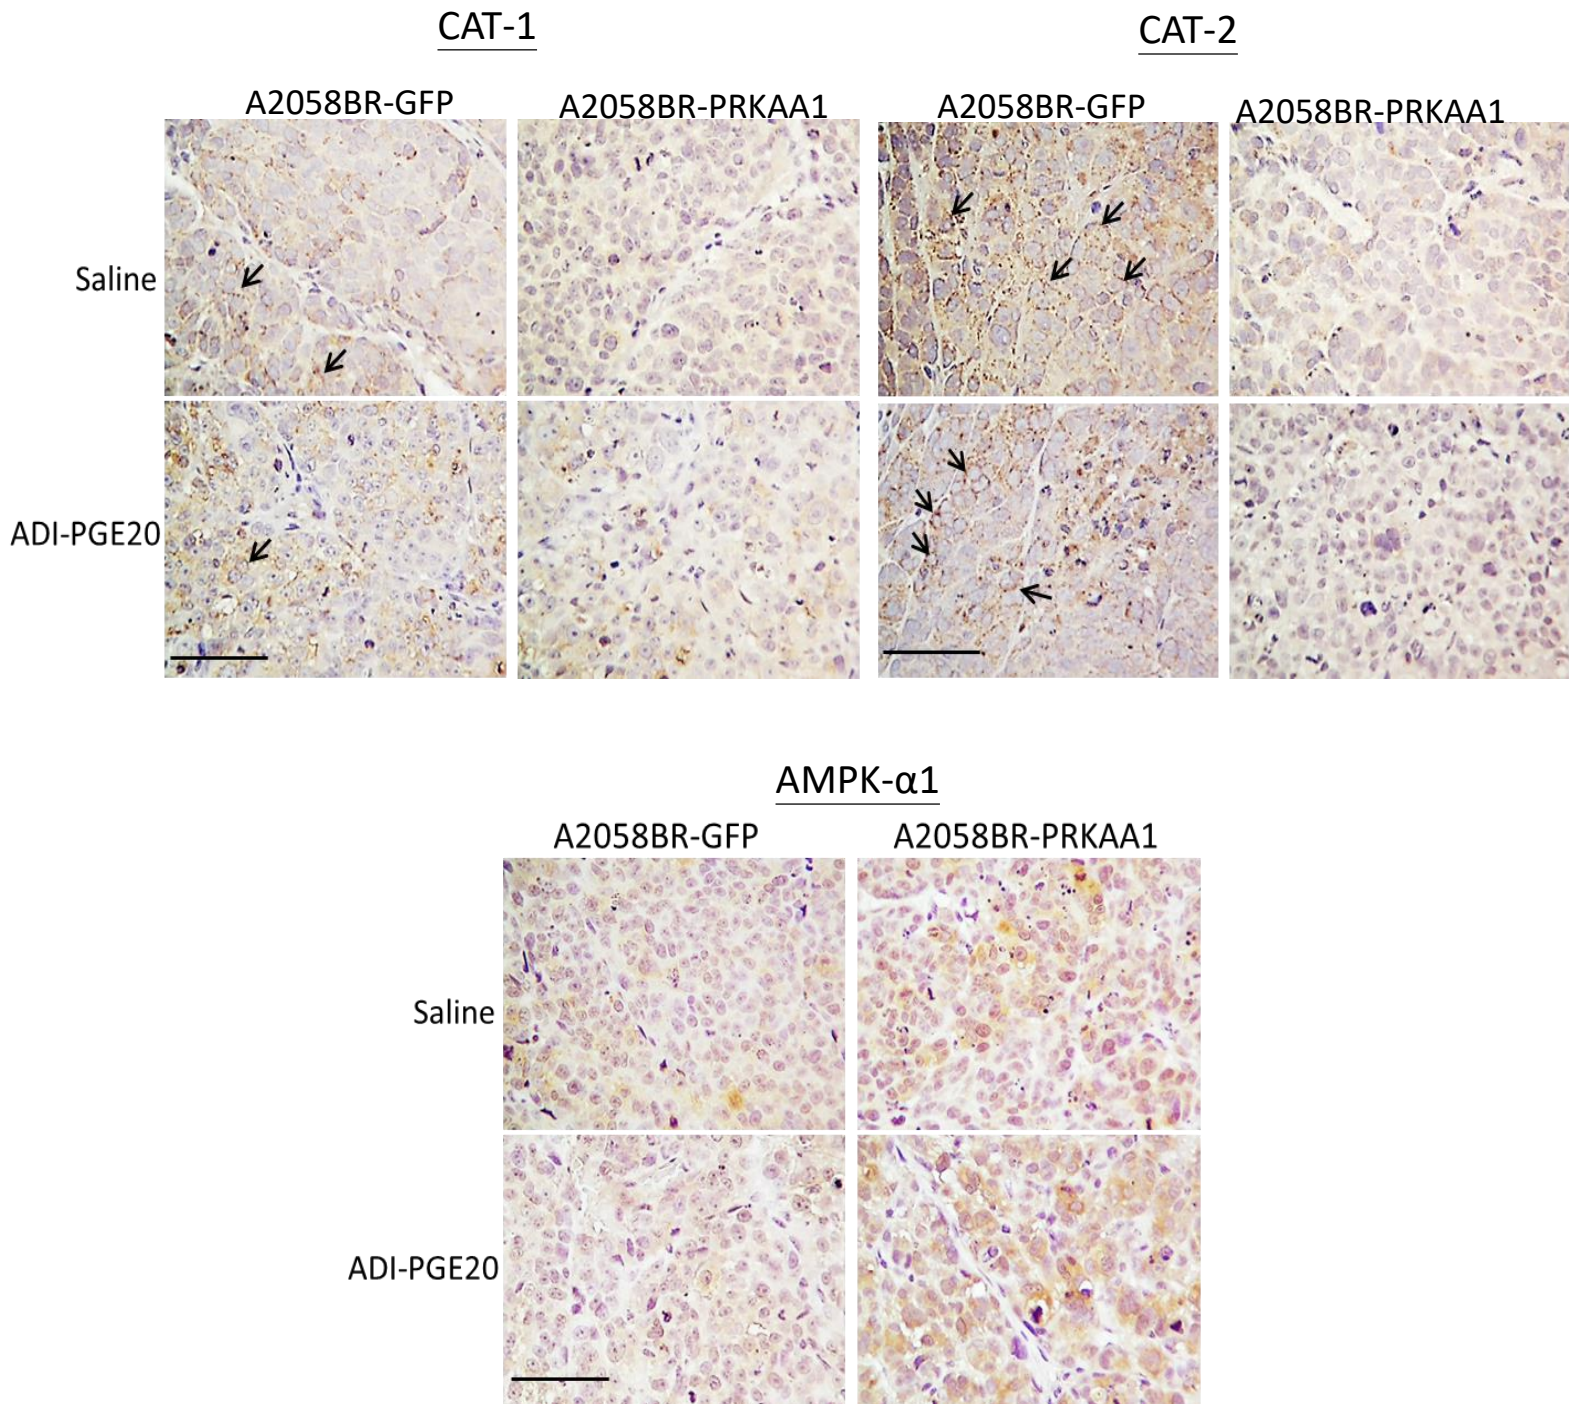

**Suppl. Fig. 5.** Mouse xenograft models demonstrate that overexpression of AMPK- $\alpha$ 1 (PRKAA1) in A2058BR cells drastically reduces CAT-2 expression, corresponding to Suppl. Fig. 4. CAT-1 and CAT-2 expressions (black arrows) were detected by IHC staining (scale bar = 100  $\mu$ m). A2058BR-GFP cells expressed high levels of CAT-2 and low levels of CAT-1. Decreased CAT-1 and CAT-2 expressions can be seen in A2058BR-PRKAA1 cells. AMPK- $\alpha$ 1 staining was used to confirm PRKAA1 overexpression.

A

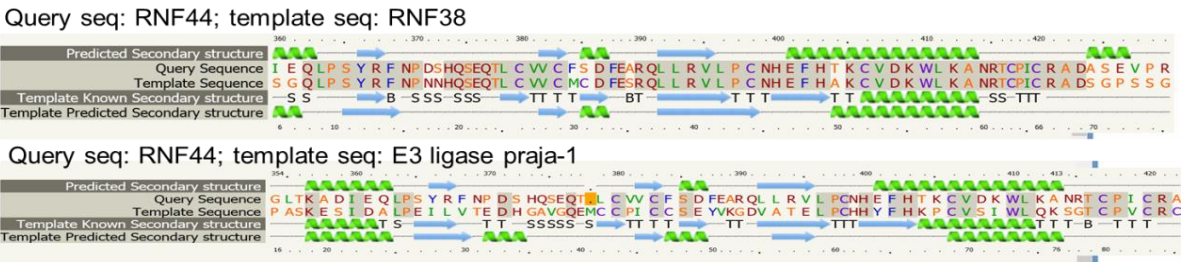

B

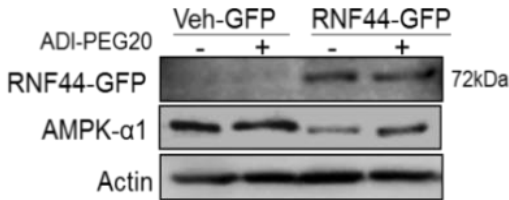

C

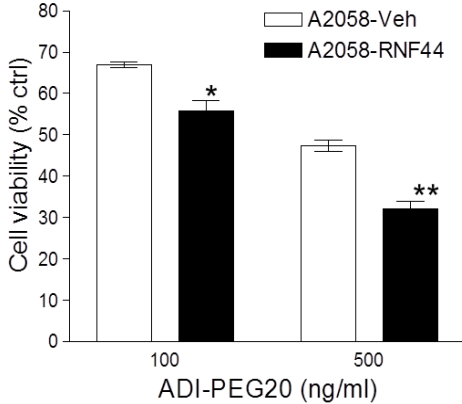

D

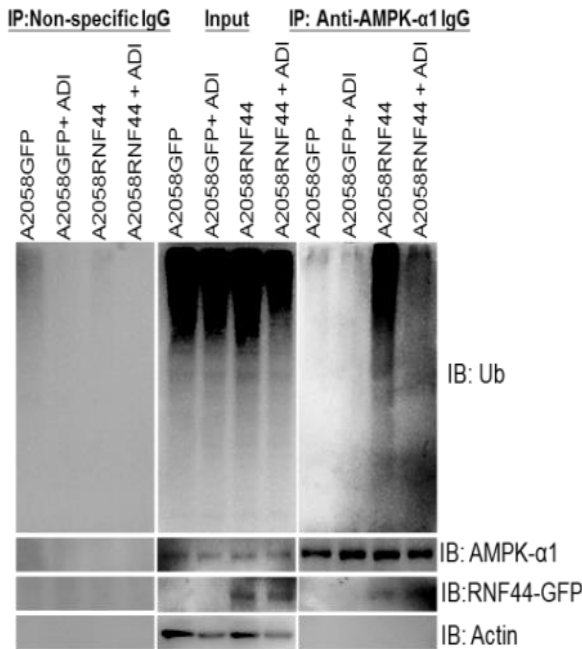

**Suppl. Fig. 6.** Overexpressing RNF44 in A2058 cells renders A2058 cells more sensitive to arginine deprivation due to enhanced ubiquitin-dependent AMPK- $\alpha$ 1 degradation. (A) The partial protein sequence of RNF44 analyzed by a server Phyre2 and PDB database is similar to RNF38 and E3 ligase praja-1. (B) Overexpression of RNF44 was confirmed by immunoblotting. (C) Cell viability of A2058 transfectants which overexpress RNF44-GFP or GFP (vehicle, veh) were assayed by MTT following ADI-PEG20 (100 or 500 ng/ml) treatment for 72 hr ( $n = 3$ , \* $p < 0.05$ , \*\* $p < 0.01$ , and \*\*\* $p < 0.005$ ). (D) RNF44-GFP and ubiquitin (Ub) were co-immunoprecipitated with AMPK- $\alpha$ 1, and subsequently analyzed by immunoblotting.

**Suppl. Fig. 7**

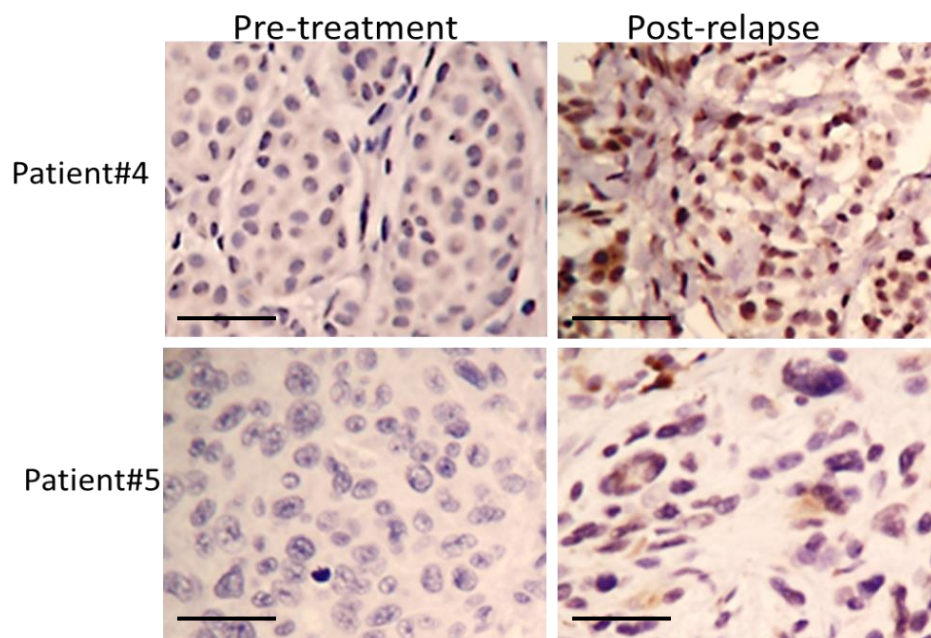

**Suppl. Fig. 7.** RNF44 expression appears in tumor tissues from patients who failed BRAFi (patient #4) or BRAFi/MEKi (patient #5) treatment, corresponding to Fig. 7C. RNF44 expression was detected by IHC staining (400 X) (scale bar = 50  $\mu$ m).
